# Supplementary material for: Characterization and Antifungal Activity of Limonoid Constituents Isolated from Meliaceae Plants Melia dubia, Aphanamixis polystachya, and Swietenia macrophylla against Plant Pathogenic Fungi In Vitro
Source: Hindawi journal article supplement (doi:10.1155/2021/4153790), 2021-07-30
Supplement: f1 [file 4153790.f1.pdf]

## SUPPLEMENTARY MATERIALS

### CHARACTERIZATION AND ANTIFUNGAL ACTIVITY OF LIMONOID CONSTITUENTS ISOLATED FROM MELIACEAE PLANTS *MELIA DUBIA*, *ANPHANAMIXIS POLYSTACHYA* AND *SWIETENIA MACROPHYLLA* AGAINST PLANT PATHOGENIC FUNGI *IN VITRO*

Thanh Nguyen Tan<sup>1</sup>, Hieu Tran Trung<sup>2</sup>, Quang Le Dang<sup>3,\*</sup>, Hien Vu Thi<sup>4</sup>, Hoang Dinh Vu<sup>5</sup>,  
Tuan Nguyen Ngoc<sup>6</sup>, Hoai Thu Thi Do<sup>3</sup>, Thanh Huong Nguyen<sup>3</sup>, Quang Dang Ngoc<sup>7</sup>, Thang  
Tran Dinh<sup>6,\*</sup>

<sup>1</sup> *School of Chemistry, Biology and Environment, Vinh University, Nghean, 43100, Vietnam*

<sup>2</sup> *School of Natural Sciences Education, Vinh University, Nghean, 43100, Vietnam*

<sup>3</sup> *R&D Center of Bioactive Compounds, Vietnam Institute of Industrial Chemistry, Hanoi, 10000,  
Vietnam*

<sup>4</sup> *Ho Chi Minh City University of Natural Resources and Environment, Ho Chi Minh, 72114,  
Vietnam*

<sup>5</sup> *The School of Chemical Engineering, Hanoi University of Science and Technology,  
Hanoi, 10000, Vietnam*

<sup>6</sup> *Institute of Biotechnology and Food Technology, Industrial University of Ho Chi Minh City, Ho  
Chi Minh, 71408, Vietnam*

<sup>7</sup> *Faculty of Chemistry, Hanoi National University of Education, Hanoi, 10000, Vietnam*

#### **\*Corresponding authors:**

Thang Tran Dinh; Email: thangtd@iuh.edu.vn

Quang Le Dang; Email: ledangquang2011@gmail.com

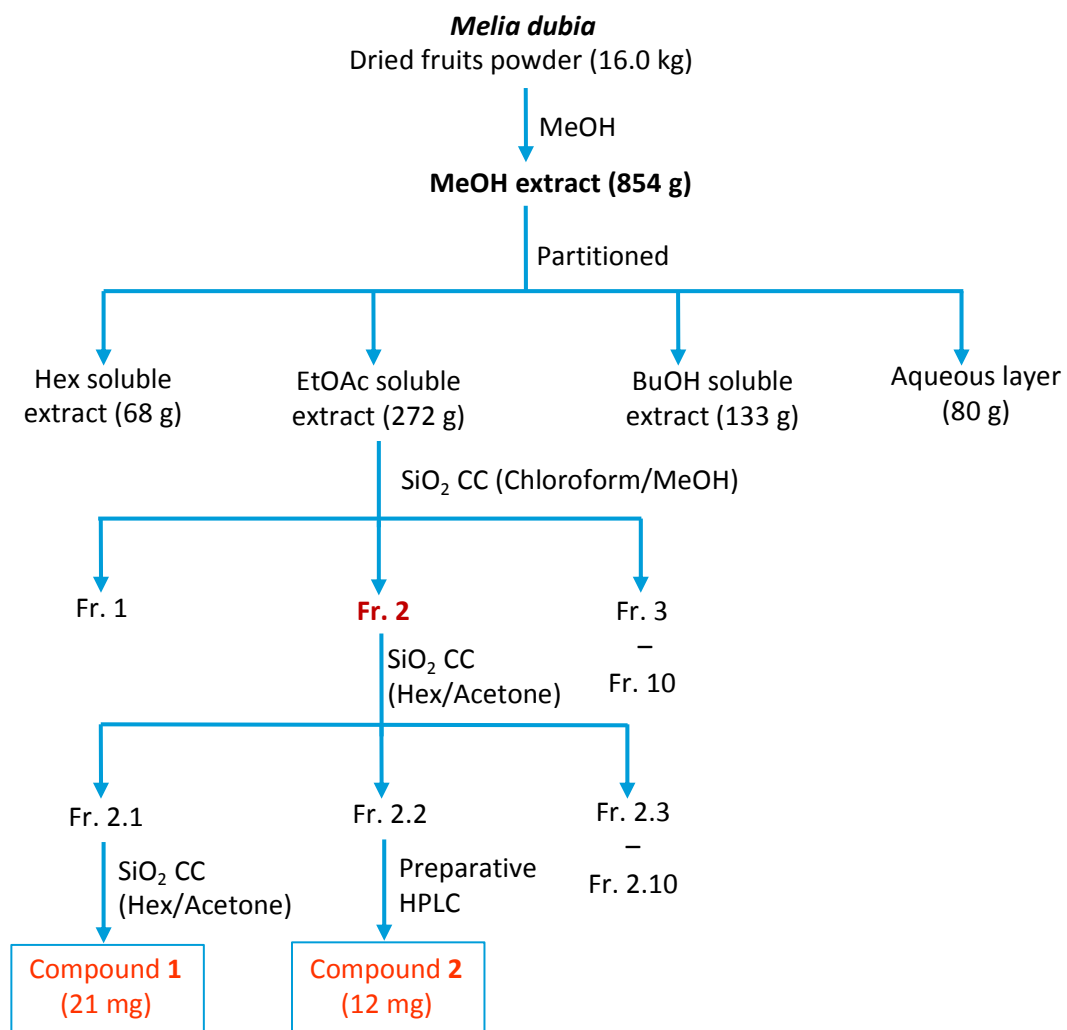

**Figure S1a.** Isolation scheme of isolated compounds **1-2** from the fruits of *Melia dubia*

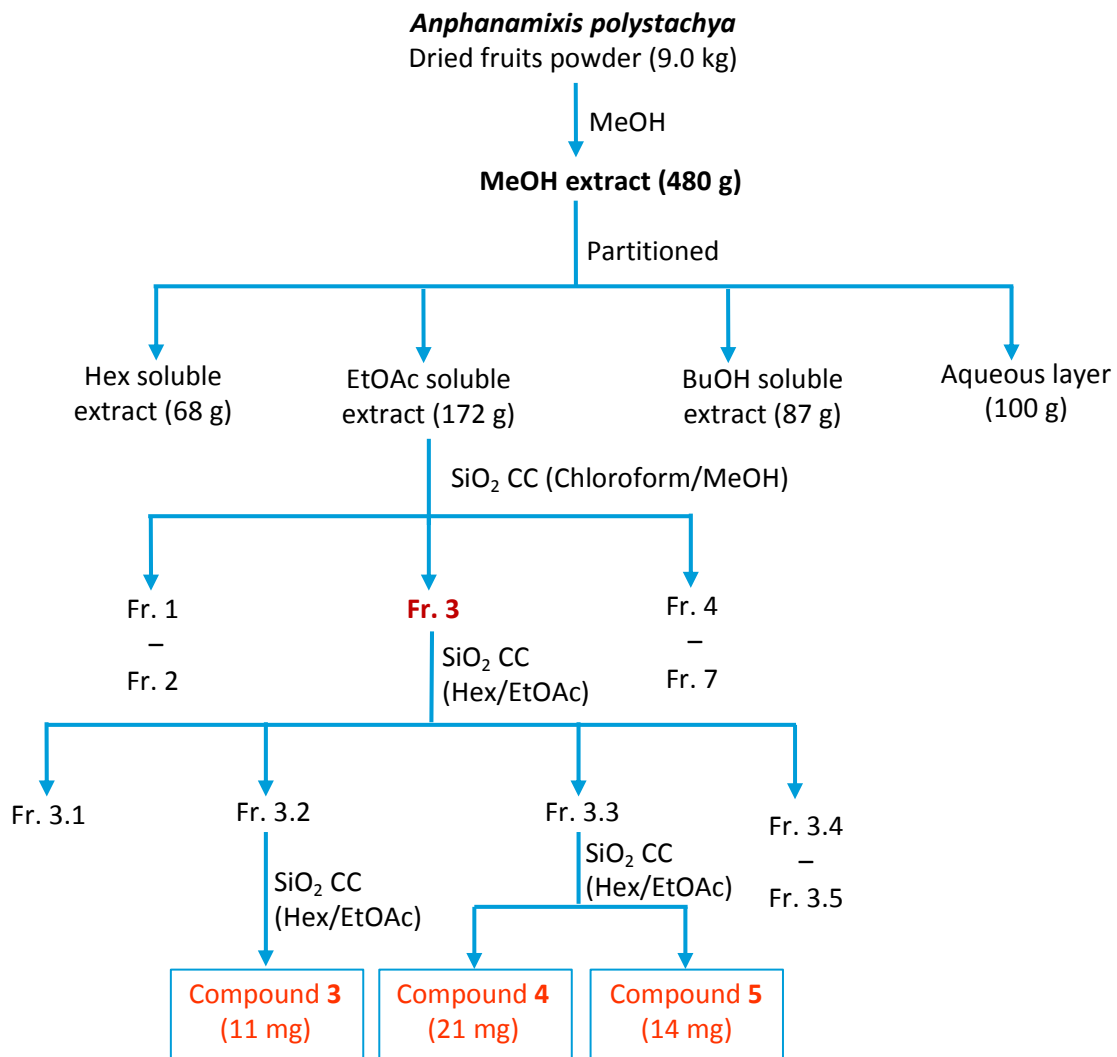

**Figure S1b.** Isolation scheme of isolated compounds **3-5** from the fruits of *Anphanamixis polystachya*

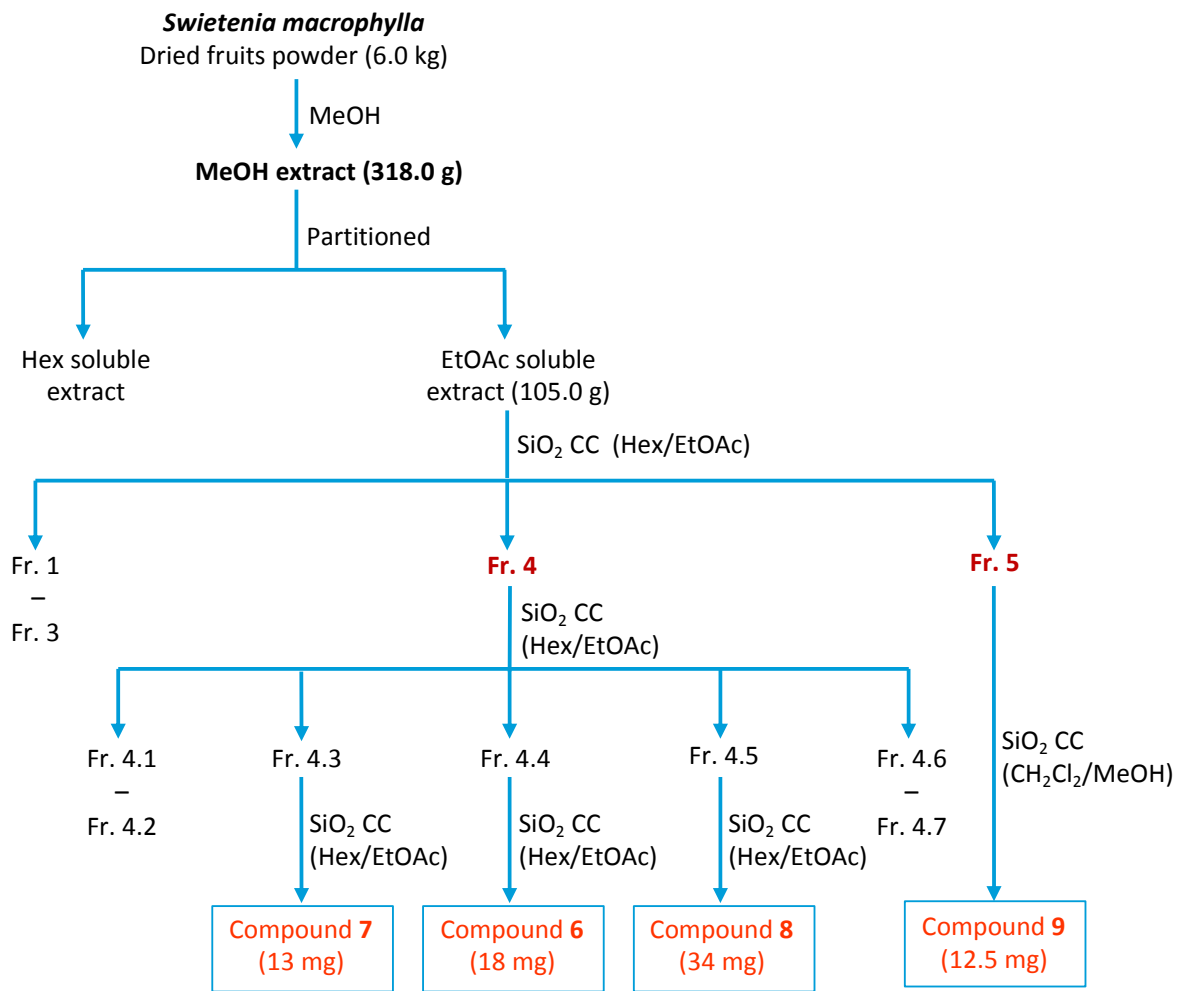

**Figure S1c.** Isolation scheme of isolated compounds **6-9** from the fruits of *Swietenia macrophylla*

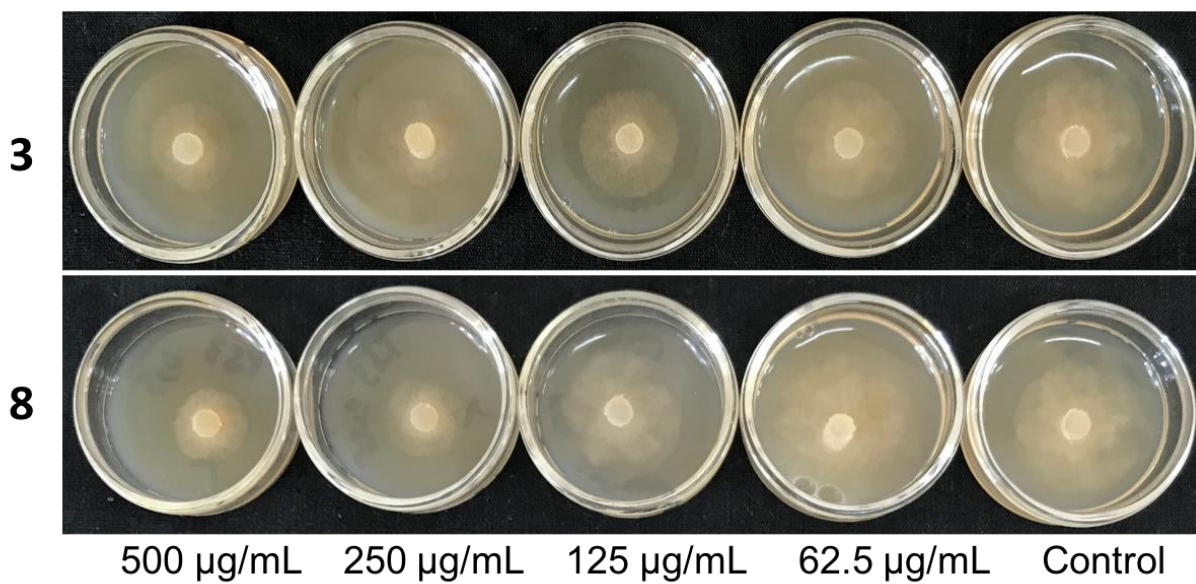

**Figure S2.** *In vitro* antifungal activity of the most active compounds **3** and **8** against the mycelial growth of *Phytophthora* spp.

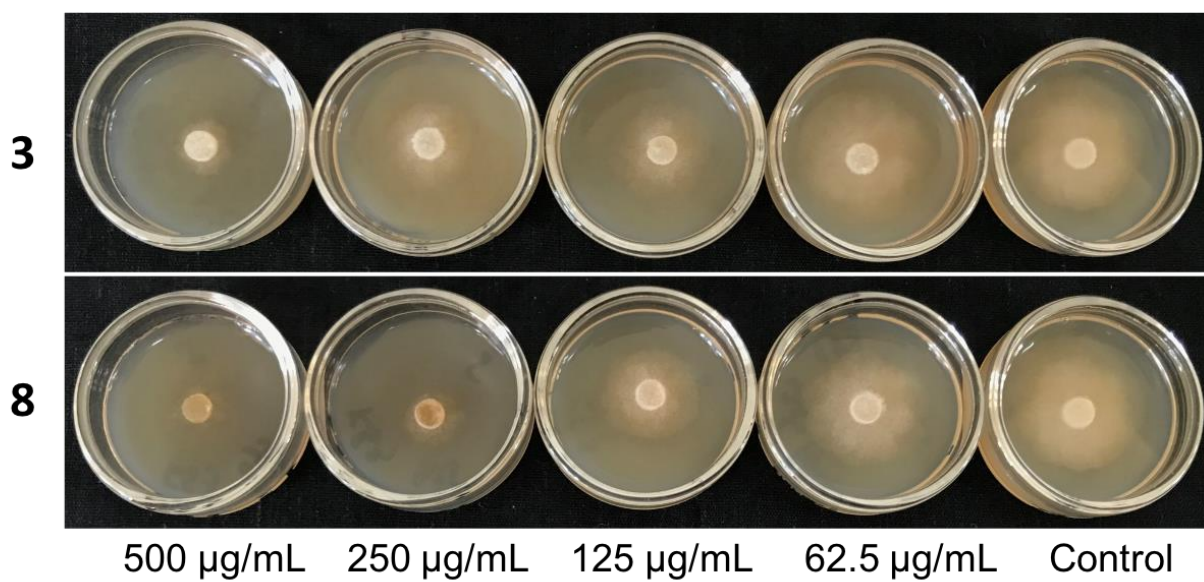

**Figure S3.** *In vitro* antifungal activity of the most active compounds **3** and **8** against the mycelial growth of *Phytophthora capsici*

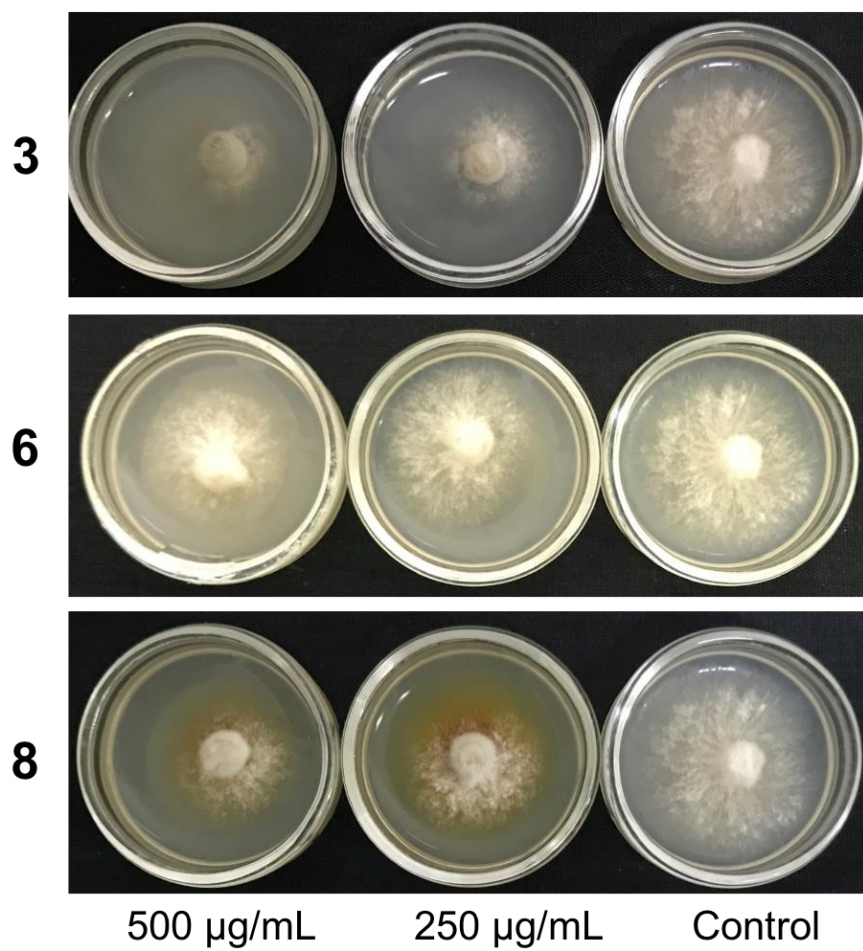

**Figure S4.** *In vitro* antifungal activity of the most active compounds **3**, **6** and **8** against the mycelial growth of *Phytophthora palmivora*

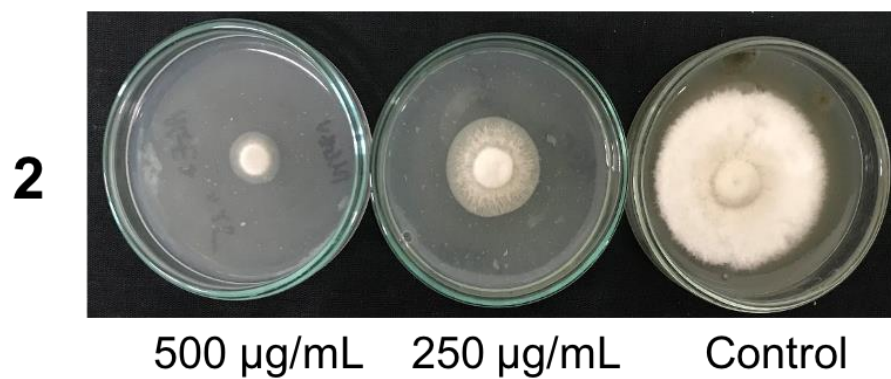

**Figure S5.** *In vitro* antifungal activity of compound **2** against the mycelial growth of *Magnaporthe oryzae*

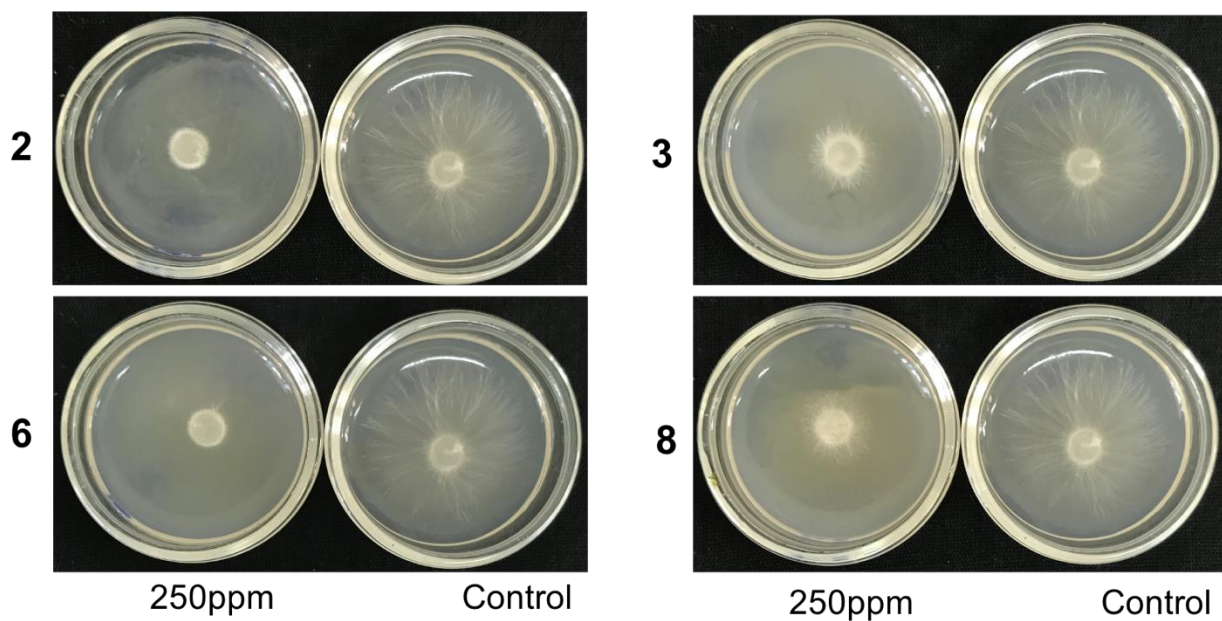

**Figure S6.** *In vitro* antifungal activity of the most active compounds **2**, **3**, **6** and **8** against the mycelial growth of *Sclerotium rolfsii*.

**Table S1.** *In vitro* inhibitory activity of MeOH extracts from *Melia dubia*, *Anphanamixis polystachya* and *Swietenia macrophylla* against *Magnaporthe oryzae*, *Phytophthora capsici* and *Sclerotium rolfsii*

| Fungi           | Conc.<br>( $\mu\text{g/mL}$ ) | Inhibition (%)       |                  |                  |
|-----------------|-------------------------------|----------------------|------------------|------------------|
|                 |                               | MeOH-MD <sup>b</sup> | MeOH-AP          | MeOH-SM          |
| MG <sup>a</sup> | 1000                          | 19.60 $\pm$ 8.40     | 31.40 $\pm$ 1.41 | 27.10 $\pm$ 6.55 |
|                 | 2000                          | 40.27 $\pm$ 5.36     | 50.30 $\pm$ 4.71 | nt               |
| PC              | 1000                          | 6.40 $\pm$ 3.93      | 15.80 $\pm$ 3.16 | 19.60 $\pm$ 3.15 |
|                 | 2000                          | 11.00 $\pm$ 3.40     | 21.40 $\pm$ 3.90 | 31.90 $\pm$ 3.90 |
| SR              | 1000                          | 44.81 $\pm$ 6.76     | 29.51 $\pm$ 7.31 | 27.90 $\pm$ 4.36 |
|                 | 2000                          | 78.85 $\pm$ 1.77     | 60.42 $\pm$ 4.03 | 69.99 $\pm$ 2.94 |

<sup>a</sup> MG: *Magnaporthe oryzae*. PC: *Phytophthora capsici*. SR: *Sclerotium rolfsii*

<sup>b</sup> Methanol extracts of *Melia dubia* (MeOH-MD), *Anphanamixis polystachya* (MeOH-AP) and *Swietenia macrophylla* (MeOH-SM) against *M. oryzae*, *P. capsici* and *S. rolfsii*

nt: not tested.
